# Supplementary material for: 5-HT4-Receptors Modulate Induction of Long-Term Depression but Not Potentiation at Hippocampal Output Synapses in Acute Rat Brain Slices
Source: PubMed Central journal article supplement (PMC3914937; doi:10.1371/journal.pone.0088085), 2014-02-05

**A1****5-HT4 agonist wash-in**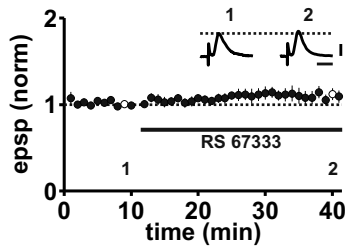**A2**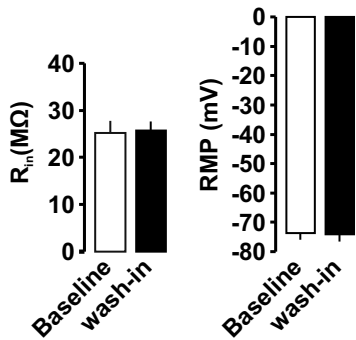**B1****5-HT4 antagonist wash-in**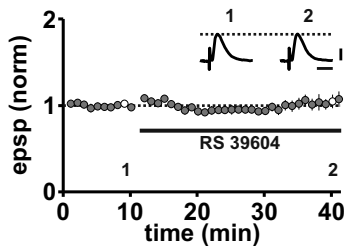**B2**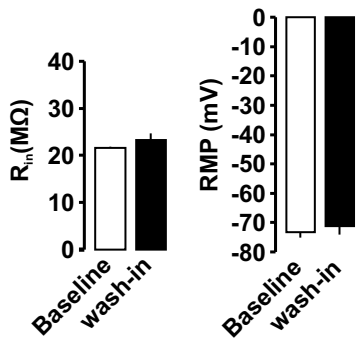

Supplement: pone.0088085.s001.pdf [file pone.0088085.s001.pdf]
