# Supplementary material for: 5-HT4-Receptors Modulate Induction of Long-Term Depression but Not Potentiation at Hippocampal Output Synapses in Acute Rat Brain Slices
Source: PubMed Central journal article supplement (PMC3914937; doi:10.1371/journal.pone.0088085), 2014-02-05
Supplement: pone.0088085.s002.pdf [file pone.0088085.s002.pdf]

**Table S1.** Synaptic and membrane properties of RS-cells in the subiculum before and after application of 5-HT<sub>4</sub> receptor ligands.

|                                              | <b>RS 67333 (10 <math>\mu</math>M)</b>            |                                 | <b>RS 39604 (25 <math>\mu</math>M)</b>            |                                 |
|----------------------------------------------|---------------------------------------------------|---------------------------------|---------------------------------------------------|---------------------------------|
| <b>EPSP (% of Baseline)</b>                  | 109.7 $\pm$ 7.8 (n=6, p=0.31)                     |                                 | 101.1 $\pm$ 5.6 (n=6, p=0.85)                     |                                 |
| <b>Rise-time (ms)</b>                        | <b>Baseline</b><br>3.4 $\pm$ 0.2<br>(n=5, p=0.50) | <b>Wash-in</b><br>3.6 $\pm$ 0.2 | <b>Baseline</b><br>2.9 $\pm$ 0.2<br>(n=5, p=0.41) | <b>Wash-in</b><br>2.7 $\pm$ 0.1 |
| <b>Decay-time (ms)</b>                       | 11.3 $\pm$ 0.9<br>(n=5, p=0.97)                   | 11.3 $\pm$ 0.9                  | 10.4 $\pm$ 0.5<br>(n=4, p=0.78)                   | 10.6 $\pm$ 0.3                  |
| <b>RMP (mV)</b>                              | -73.5 $\pm$ 2.2<br>(n=6, p=0.77)                  | -73.8 $\pm$ 2.5                 | -73.0 $\pm$ 1.8<br>(n=4, p=0.26)                  | -70.9 $\pm$ 2.9                 |
| <b>R<sub>in</sub> (M<math>\Omega</math>)</b> | 25.2 $\pm$ 2.6<br>(n=4, p=0.89)                   | 25.8 $\pm$ 1.8                  | 21.6 $\pm$ 0.3<br>(n=4, p=0.46)                   | 23.2 $\pm$ 1.5                  |

Data given as means  $\pm$  SEM.
