# Supplementary material for: 5-HT4-Receptors Modulate Induction of Long-Term Depression but Not Potentiation at Hippocampal Output Synapses in Acute Rat Brain Slices
Source: PubMed Central journal article supplement (PMC3914937; doi:10.1371/journal.pone.0088085), 2014-02-05
Supplement: pone.0088085.s003.pdf [file pone.0088085.s003.pdf]

**Table S2.** Normalized mean delta of the initial slope of EPSPs of BS-cells in the subiculum after HFS or LFS in control condition and after application of 5-HT4 receptor ligands.

|                              | <b>HFS</b>              | <b>LFS</b>                                                                         |
|------------------------------|-------------------------|------------------------------------------------------------------------------------|
| <b>Control</b>               | 2.81±0.57 (n=7, p<0.01) | 0.59±0.06 (n=6, p<0.01)                                                            |
| <b>Agonist (RS 67333)</b>    | 3.02±1.23 (n=7, p<0.05) | 0.38±0.06 (n=6, p<0.01)                                                            |
| <b>Antagonist (RS 39604)</b> | 2.73±0.39 (n=6, p<0.01) | 0.94±0.04 (n=5, p=0.28)                                                            |
| <b>ANOVA (one-way)</b>       | F(2,17)=0.026, p=0.98   | F(2,14)=19.307, p<0.001                                                            |
| <b>Posthoc</b>               | -                       | Control-RS 67333: p=0.08<br>Control-RS 39604: p<0.01<br>RS 67333-RS 39604: p<0.001 |

Data given as means ± SEM.
